# Supplementary material
Source: Springer Nature journal article supplement (https://www.springermedizin.de/resource/supplementary/13063_2014_2251_MOESM1_ESM.pdf/9621728)

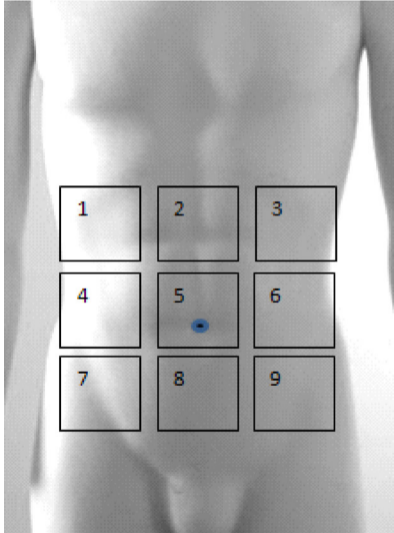

a

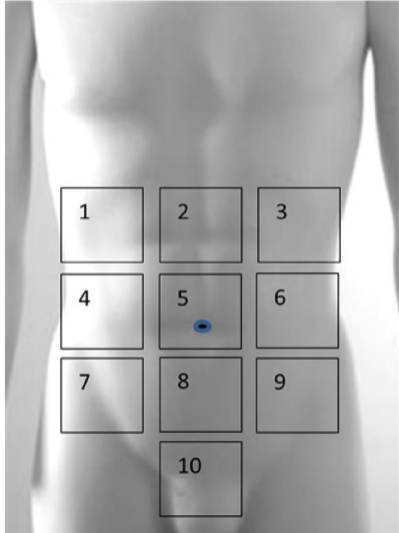

b

Supplement: MOESM1 [file 9621728]
